# Supplementary material for: Delivery of siRNA to Ewing Sarcoma Tumor Xenografted on Mice, Using Hydrogenated Detonation Nanodiamonds: Treatment Efficacy and Tissue Distribution
Source: PubMed Central journal article supplement (PMC7153391; doi:10.3390/nano10030553), 2020-03-19
Supplement: nanomaterials-10-00553-s001.pdf [file nanomaterials-10-00553-s001.pdf]

# Delivery of siRNA to Ewing Sarcoma Tumor Xenografted on Mice, Using Hydrogenated Detonation Nanodiamonds: Treatment Efficacy and Tissue Distribution

Sandra Claveau <sup>1,2</sup>, Émilie Nehlig <sup>3</sup>, Sébastien Garcia-Argote <sup>3</sup>, Sophie Feuillastre <sup>3</sup>, Grégory Pieters <sup>3</sup>, Hugues A. Girard <sup>4</sup>, Jean-Charles Arnault <sup>4</sup>, François Treussart <sup>1,5,†,\*</sup> and Jean-Rémi Bertrand <sup>2,†</sup>

<sup>1</sup> LuMIn, CNRS, ENS Paris-Saclay, CentraleSupélec, Université Paris-Saclay, 91405, Orsay, France; [sandra.claveau@live.fr](mailto:sandra.claveau@live.fr) (S.C.)

<sup>2</sup> Vectorologie et Thérapeutiques Anticancéreuses, CNRS, Institut Gustave Roussy, Université Paris-Saclay, 94805, Villejuif, France ; [jean-remi.bertrand@gustaveroussy.fr](mailto:jean-remi.bertrand@gustaveroussy.fr) (J.-R.B.)

<sup>3</sup> SCBM, Institut Joliot, CEA, Université Paris-Saclay, 91191, Gif-sur-Yvette, France ; [e.nehlig@gmail.fr](mailto:e.nehlig@gmail.fr) (E.N.) ; [sebastien.garcia-argote@cea.fr](mailto:sebastien.garcia-argote@cea.fr) (S.G.-A.) ; [sophie.feuillastre@cea.fr](mailto:sophie.feuillastre@cea.fr) (S.F.) ; [gregory.pieters@cea.fr](mailto:gregory.pieters@cea.fr) (G.P.)

<sup>4</sup> Diamond Sensors Laboratory, Institut LIST, CEA, Université Paris-Saclay, 91191, Gif-sur-Yvette, France ; [hugues.girard@cea.fr](mailto:hugues.girard@cea.fr) (H.A.G.) ; [jean-charles.arnault@cea.fr](mailto:jean-charles.arnault@cea.fr) (J.C.A.)

<sup>5</sup> Institut d'Alembert, CNRS, ENS Paris-Saclay, Université Paris-Saclay, 91190, Gif-sur-Yvette, France

\* Correspondence: [francois.treussart@ens-paris-saclay.fr](mailto:francois.treussart@ens-paris-saclay.fr) (F.T.)

† Co-senior authors

## Supplementary Materials

**Table S1. Determination of free tritium in nanodiamond suspension and in mice urine after injection.** To evaluate the fraction of labile tritium the solutions were centrifugated during 3 h at acceleration 10600 *g* (50Ti rotor in XL90 Beckman ultracentrifuge). Aliquots of 100  $\mu$ L were sampled before and after centrifugation and then diluted in 8 mL final volume of deionized water before radioactivity measurement by liquid scintillation. In the case of T-DND solution, we detected 5% of the initial deionized water dose present in the supernatant. We consider that this radioactivity is due to tritiated water, since it could be fully recovered on a paper filter after evaporation and re-condensation in a closed tube. The resulted centrifugated T-DND was the “purified T-DND” injected into the mice. Note that an additional centrifugation of this purified T-DND solution still reveals 2% of activity in the supernatant, which indicates that adsorbed tritium is still present at DND surface. Then, to determine if T-DND were present in urines, a similar centrifugation protocol was applied to 2 mL of urines collected 24 h after purified T-DND injection, and diluted in 8 mL final volume of deionized water. We did not detect a significant change of radioactivity in the aqueous phase after centrifugation. Furthermore, there was no solid T-DND pellet for all the 3 conditions tested (free T-DND and for the two T-DND coated with a siRNA).

|                  | DND suspension before centrifugation (counts per minutes, cpm) | Supernatant of centrifugation (cpm) | % of the initial dose present in the supernatant |
|------------------|----------------------------------------------------------------|-------------------------------------|--------------------------------------------------|
| T-DND            | 1382796                                                        | 63341                               | 5                                                |
| purified T-DND   | 1219936                                                        | 24223                               | 2                                                |
| Urine T-DND      | 113                                                            | 131                                 | 117                                              |
| Urine T-DND:siAS | 89                                                             | 106                                 | 119                                              |
| Urine T-DND:siCt | 115                                                            | 104                                 | 90                                               |

**Table S2. Size measurement of hydrogenated and tritiated DND.** Hydrodynamic diameters are inferred from scattered light intensity time autocorrelation. The raw data are in the first column (from left); the size “in number” (second column) is obtained from raw data after correction from Rayleigh and Mie scatterings, which reinforces the contribution of the smallest nanoparticles having a lower scattering efficiency. PDI (third column): polydispersity index. Zeta potential is displayed in the fourth column. *n.d.*: not determined. H-DND-24 and T-DND are the two samples used for *in vitro* and *in vivo* siRNA delivery.

| Sample ref. | hydrodynamic diameter in intensity (nm) | hydrodynamic diameter in number (nm) | PDI  | Zeta Potential (mV) |
|-------------|-----------------------------------------|--------------------------------------|------|---------------------|
| H-DND-22    | 75                                      | 31                                   | 0.17 | +40                 |
| H-DND-23    | 72                                      | 31                                   | 0.21 | +46                 |
| H-DND-24    | 63                                      | 56                                   | 0.18 | +55                 |
| T-DND       | 93                                      | 48                                   | 0.23 | <i>n.d.</i>         |
